# Supplementary material for: A novel circRNA-miRNA-mRNA network identifies circ-YOD1 as a biomarker for coronary artery disease
Source: PubMed Central journal article supplement (PMC6892882; doi:10.1038/s41598-019-54603-2), 2019-12-04
Supplement: 41598_2019_54603_MOESM2_ESM.pdf [file 41598_2019_54603_MOESM2_ESM.pdf]

# **A novel circRNA-miRNA-mRNA network identifies circ-YOD1 as a biomarker for coronary artery disease**

Liu Miao<sup>1</sup>, Rui-Xing Yin ID<sup>1,2,3\*</sup>, Qing-Hui Zhang<sup>1</sup>, Pei-Juan Liao<sup>1</sup>, Yong Wang<sup>1</sup>, Rong-Jun Nie<sup>1</sup>, Hui Li<sup>4</sup>

1. Department of Cardiology, Institute of Cardiovascular Diseases, The First Affiliated Hospital, Guangxi Medical University, 6 Shuangyong Road, Nanning 530021, Guangxi, China.
2. Guangxi Key Laboratory Base of Precision Medicine in Cardio-cerebrovascular Disease Control and Prevention, 6 Shuangyong Road, Nanning 530021, Guangxi, China.
3. Guangxi Clinical Research Center for Cardio-cerebrovascular Diseases, 6 Shuangyong Road, Nanning 530021, Guangxi, China.
4. Clinical Laboratory of the Affiliated Cancer Hospital, Guangxi Medical University, 71 Hedi Road, Nanning 530021, Guangxi, China.

\* Corresponding author: Rui-Xing Yin; yinruixing@163.com

Department of Cardiology, Institute of Cardiovascular Diseases, The First Affiliated Hospital, Guangxi Medical University, Nanning 530021, Guangxi, PR China  
ID: 0000-0001-7883-4310

**Running title:** circ-YOD1 is a biomarker for coronary artery disease

dr.miaoliu@qq.com

yinruixing@163.com

zhangqinghuixx@163.com

peijuanliao@163.com

wangyong007-007@163.com

nrj2001@163.com

nnlihui@163.com

**Supplementary Table 3.** Basic information of the microarray datasets from GEO

| Data source | Platform | Country        | Contact name        | Type  | Ctrl (n) | Case (n) | Ref. |
|-------------|----------|----------------|---------------------|-------|----------|----------|------|
| GSE34198    | GPL6102  | Czech Republic | Michal Kolář        | mRNA  | 48       | 49       | [14] |
| GSE62646    | GPL6244  | Poland         | Beata Burzynska     | mRNA  | 14       | 84       | [15] |
| GSE60993    | GPL6884  | South Korea    | JUNGWOO EUN         | mRNA  | 7        | 17       | [16] |
| GSE61144    | GPL6106  | South Korea    | JUNGWOO EUN         | mRNA  | 10       | 7        | [16] |
| GSE24548    | GPL8227  | Italy          | Gerolamo Lanfranchi | miRNA | 3        | 4        | No   |
| GSE53211    | GPL18049 | Germany        | Julia Osipova       | miRNA | 4        | 9        | No   |
| GSE61741    | GPL9040  | Germany        | Andreas Keller      | miRNA | 34       | 62       | [17] |

n, numbers. Ctrl, Control. Ref, Reference. The experimental designed as case-control study and the case disease was related to CAD. All samples analyzed by the microarray were peripheral blood.
